# Supplementary material for: Effects of Universal Digital Mental Health Interventions for Children and Youth on Psychological Outcomes – A Systematic Review and Meta-Analysis
Source: Research Square preprint supplement (doi:10.21203/rs.3.rs-6811900/v1), 2025-06-13
Supplement: Supplementary file 2 [file 66120140a86a41cb2af549ef.pdf]

## Supplemental Online Content

**Supplementary Table 1.** Journal Articles Excluded During Full-Text Screening

| <b>Author(s)</b> | <b>Year</b> | <b>Title</b>                                                                                                                                                                               | <b>DOI/URL</b>                                                                                  | <b>Reason for Exclusion</b> |
|------------------|-------------|--------------------------------------------------------------------------------------------------------------------------------------------------------------------------------------------|-------------------------------------------------------------------------------------------------|-----------------------------|
| Abozayed         | 2022        | Online Multicomponent Program for Mental Health Promotion of Medical Students: An Intervention Study                                                                                       | <a href="https://doi.org/10.3889/OAMJMS.2022.9174">10.3889/OAMJMS.2022.9174</a>                 | Wrong Age                   |
| AreskougSandberg | 2024        | A 10-week school-based mindfulness intervention and symptoms of depression and anxiety among school children and adolescents: A controlled study.                                          | <a href="https://doi.org/10.1007/s12310-023-09620-y">10.1007/s12310-023-09620-y</a>             | Wrong Intervention Format   |
| Bacio            | 2020        | Facilitating Change in Drinking Cognitions and Behaviors Among Three Immigrant Generations of Latinx Youth Through a School-Based Intervention: Findings From a Multi-Site Clinical Trial. | <a href="https://doi.org/10.3389/fpsy.2020.574487">10.3389/fpsy.2020.574487</a>                 | Wrong Intervention Format   |
| Badesha          | 2023        | Mental health mobile application self-help for adolescents exhibiting psychological distress: A single case experimental design.                                                           | <a href="https://doi.org/10.1111/papt.12436">10.1111/papt.12436</a>                             | Mental health Diagnosis     |
| Barral           | 2022        | A Pilot Intervention to Reduce Adolescent Sexual and Mental Health Disparities by Increasing Access to Telemedicine and Mobile Care (AccessKCTeen)                                         | <a href="https://doi.org/10.1016/j.jadohealth.2022.01.136">10.1016/j.jadohealth.2022.01.136</a> | No Mental Health Outcomes   |
| Bei              | 2011        | Development & feasibility trial of a mindfulness-based multi-component in-school group sleep intervention for poor sleep & anxiety symptoms in adolescent girls                            | <a href="https://doi.org/10.1111/j.1479-8425.2011.00518.x">10.1111/j.1479-8425.2011.00518.x</a> | Wrong Article Type          |

|              |      |                                                                                                                                                                                      |                                                  |                           |
|--------------|------|--------------------------------------------------------------------------------------------------------------------------------------------------------------------------------------|--------------------------------------------------|---------------------------|
| Bisal        | 2022 | Feasibility of a secondary school-based mental health intervention: Reprezents' On The Level                                                                                         | <a href="#">s13034-022-00534-2.pdf</a>           | No Mental Health Outcomes |
| Carriere     | 2024 | Winner for Life: A three-year study of student-athletes' life skills development in a training programme for coaches and teachers.                                                   | <a href="#">10.1016/j.psychsport.2023.102573</a> | Wrong Intervention Format |
| Chen         | 2023 | Creating youth engaging platform for early mental health intervention: Preliminary findings from LevelMind@JC project in Hong Kong                                                   | <a href="#">10.1111/eip.13408</a>                | Wrong Article Type        |
| Coughlin     | 2009 | A controlled clinical evaluation of the parents plus children's programme: a video-based programme for parents of children aged 6 to 11 with behavioural and developmental problems. | <a href="#">10.1177/1359104509339081</a>         | Wrong Intervention Format |
| CraigRushing | 2021 | Efficacy of an mHealth Intervention (BRAVE) to Promote Mental Wellness for American Indian and Alaska Native Teenagers and Young Adults: Randomized Controlled Trial.                | <a href="#">10.2196/26158</a>                    | Wrong Age                 |
| deJong       | 2023 | The efficacy of a self-help parenting program for parents of children with externalizing behavior: a randomized controlled trial.                                                    | <a href="#">10.1007/s00787-022-02028-0</a>       | Mental Health Diagnosis   |
| Dickter      | 2019 | Impact of an online depression prevention intervention on suicide risk factors for adolescents and young adults.                                                                     | <a href="#">10.21037/mhealth.2019.04.01</a>      | Mental Health Diagnosis   |
| Dietvorst    | 2021 | A serious game smart phone application (Grow it!) that promotes wellbeing and resilience in Dutch adolescents during the COVID -19 pandemic                                          | <a href="#">10.1111/bdi.13097</a>                | Wrong Article Type        |

|            |      |                                                                                                                                                                                    |                                                  |                           |
|------------|------|------------------------------------------------------------------------------------------------------------------------------------------------------------------------------------|--------------------------------------------------|---------------------------|
| Foskolos   | 2023 | Brief parenting seminars for preventing child behavioral and emotional difficulties: A pilot randomized controlled trial.                                                          | <a href="#">10.1007/s10826-023-02653-6</a>       | Wrong Intervention Format |
| Haggerty   | 2023 | Two-Year Risk Behavior Outcomes from Connecting, a Prevention Program for Caregivers and Youth in Foster Care.                                                                     | <a href="#">10.1007/s11121-022-01390-4</a>       | Wrong Article Type        |
| Haggerty   | 2023 | Family, Mental Health, and Placement Outcomes of a Low-cost Preventive Intervention for Youth in Foster Care.                                                                      | <a href="#">10.1016/j.childyouth.2023.106973</a> | No Mental Health Outcomes |
| Haug       | 2023 | Predictors of Youth Accessibility for a Mobile Phone-Based Life Skills Training Program for Addiction Prevention.                                                                  | <a href="#">10.3390/ijerph20146379</a>           | Wrong Intervention Format |
| Hennefield | 2024 | Early Emotion Development Intervention Improves Mental Health Outcomes in Low-Income, High-Risk Community Children.                                                                | <a href="#">10.1007/s10578-023-01639-1</a>       | Mental Health Diagnosis   |
| Hill       | 2023 | Open trial of a brief, web-assisted behavioural intervention to reduce thwarted belongingness and suicidal ideation among adolescents: The Supporting Grieving Teens intervention. | <a href="#">10.1002/capr.12582</a>               | Mental Health Diagnosis   |
| Huen       | 2016 | Evaluation of a digital game-based learning program for enhancing youth mental health: A structural equation modeling of the program effectiveness                                 | <a href="#">10.2196/mental.5656</a>              | Insufficient Data         |
| Ji         | 2023 | Effectiveness of an integrated motivational cognitive-behavioral group intervention for adolescents with gaming disorder: a randomized controlled trial                            | <a href="#">10.1111/add.16292</a>                | Wrong Intervention Format |
| Jolley     | 2023 | A cluster randomised, 16-week, parallel-group multicentre trial to compare the effectiveness of a digital school-based                                                             | <a href="#">10.1186/s13063-023-07267-3</a>       | Wrong Article Type        |

|                |      |                                                                                                                                                                                                                                                      |                                              |                           |
|----------------|------|------------------------------------------------------------------------------------------------------------------------------------------------------------------------------------------------------------------------------------------------------|----------------------------------------------|---------------------------|
|                |      | cognitive behavioural resilience/wellbeing-building intervention targeting emotional and behavioural problems in vulnerable Year 4 prima                                                                                                             |                                              |                           |
| Jones          | 2024 | Technology-enhanced program for child disruptive behavior disorders: development and pilot randomized control trial.                                                                                                                                 | <a href="#">10.1080/15374416.2013.822308</a> | Mental Health Diagnosis   |
| Kierfeld       | 2013 | Effectiveness of telephone-assisted parent-administered behavioural family intervention for preschool children with externalizing problem behaviour: a randomized controlled trial.                                                                  | <a href="#">10.1007/s00787-013-0397-7</a>    | Mental Health Diagnosis   |
| Kirchner       | 2022 | Effects of "It Gets Better" Suicide Prevention Videos on Youth Identifying as Lesbian, Gay, Bisexual, Transgender, Queer, or Other Sexual or Gender Minorities: A Randomized Controlled Trial.                                                       | <a href="#">10.1089/lgbt.2021.0383</a>       | Wrong Age                 |
| KleinVelderman | 2006 | Preventing preschool externalizing behavior problems through video-feedback intervention in infancy.                                                                                                                                                 | <a href="#">10.1002/imhj.20104</a>           | Wrong Intervention Format |
| LeverTaylor    | 2014 | The effectiveness of self-help mindfulness-based cognitive therapy in a student sample: a randomised controlled trial.                                                                                                                               | <a href="#">10.1016/j.brat.2014.09.007</a>   | Wrong Age                 |
| Lockwood       | 2022 | Effectiveness, User Engagement and Experience, and Safety of a Mobile App (Lumi Nova) Delivering Exposure-Based Cognitive Behavioral Therapy Strategies to Manage Anxiety in Children via Immersive Gaming Technology: Preliminary Evaluation Study. | <a href="#">10.2196/29008</a>                | Mental Health Diagnosis   |

|                |      |                                                                                                                                                                                                          |                                               |                           |
|----------------|------|----------------------------------------------------------------------------------------------------------------------------------------------------------------------------------------------------------|-----------------------------------------------|---------------------------|
| Lohaus         | 2009 | Stress prevention in adolescence: Effects of a training program with an accompanying internet platform.                                                                                                  | <a href="#">10.1026/0943-8149.17.1.13</a>     | Wrong Article Type        |
| MacIsaac       | 2021 | Adverse Childhood Experiences and Building Resilience With the JoyPop App: Evaluation Study.                                                                                                             | <a href="#">10.2196/25087</a>                 | Wrong Age                 |
| Miller-Chagnon | 2024 | The benefits of mindfulness training for momentary mindfulness and emotion regulation: A randomized controlled trial for adolescents exposed to chronic stressors.                                       | <a href="#">10.1037/ccp0000910</a>            | Wrong Intervention Format |
| O’Kearney      | 2006 | Effects of a cognitive-behavioural internet program on depression, vulnerability to depression and stigma in adolescent males: a school-based controlled trial.                                          | <a href="#">10.1080/16506070500303456</a>     | Mental Health Diagnosis   |
| Pisani         | 2018 | Mobile Phone Intervention to Reduce Youth Suicide in Rural Communities: Field Test.                                                                                                                      | <a href="#">10.2196/10425</a>                 | Wrong Article Type        |
| Poppelaars     | 2016 | A randomized controlled trial comparing two cognitive-behavioral programs for adolescent girls with subclinical depression: A school-based program (Op Volle Kracht) and a computerized program (SPARX). | <a href="#">10.1016/j.brat.2016.03.005</a>    | Mental Health Diagnosis   |
| RivaCrugnola   | 2021 | Video-feedback attachment based intervention aimed at adolescent and young mothers: Effectiveness on infant-mother interaction and maternal mind-mindedness.                                             | <a href="#">10.1080/03004430.2019.1652172</a> | Wrong Intervention Format |
| Sanchez        | 2017 | Improving Children's Mental Health with a Digital Social Skills Development Game: A Randomized Controlled                                                                                                | <a href="#">10.1089/g4h.2015.0108</a>         | Mental Health Diagnosis   |

|            |      |                                                                                                                                                                                         |                                              |                           |
|------------|------|-----------------------------------------------------------------------------------------------------------------------------------------------------------------------------------------|----------------------------------------------|---------------------------|
|            |      | Efficacy Trial of Adventures aboard the S.S. GRIN.                                                                                                                                      |                                              |                           |
| Saulsberry | 2013 | Chicago Urban Resiliency Building (CURB): An internet-based depression-prevention intervention for urban African-American and Latino adolescents.                                       | <a href="#">10.1007/s10826-012-9627-8</a>    | Wrong Article Type        |
| Schoneveld | 2018 | Preventing Childhood Anxiety Disorders: Is an Applied Game as Effective as a Cognitive Behavioral Therapy-Based Program?.                                                               | <a href="#">10.1007/s11121-017-0843-8</a>    | Wrong Article Type        |
| Sim        | 2022 | The Role of Parent Engagement in a Web-Based Preventive Parenting Intervention for Child Mental Health in Predicting Parenting, Parent and Child Outcomes.                              | <a href="#">10.3390/ijerph19042191</a>       | Wrong Article Type        |
| Soares     | 2022 | The effects of engagement with an online depression prevention program for adolescents on suicide risk factors.                                                                         | <a href="#">10.1007/s41347-022-00249-3</a>   | Mental Health Diagnosis   |
| Spence     | 2019 | Social support as a predictor of treatment adherence and response in an open-access, self-help, internet-delivered cognitive behavior therapy program for child and adolescent anxiety. | <a href="#">10.1016/j.invent.2019.100268</a> | Mental Health Diagnosis   |
| St-Pierre  | 2017 | Evaluation of a school-based gambling prevention program for adolescents: Efficacy of using the theory of planned behaviour.                                                            | <a href="#">10.4309/jgi.2017.36.6</a>        | Wrong Intervention Format |
| Stewart    | 2020 | Feasibility and effectiveness of a telehealth service delivery model for treating childhood posttraumatic stress: A community-based, open pilot trial of                                | <a href="#">10.1037/int0000225</a>           | Mental Health Diagnosis   |

|            |      |                                                                                                                                                                                                                           |                                                |                           |
|------------|------|---------------------------------------------------------------------------------------------------------------------------------------------------------------------------------------------------------------------------|------------------------------------------------|---------------------------|
|            |      | trauma-focused cognitive-behavioral therapy                                                                                                                                                                               |                                                |                           |
| Thorsen    | 2018 | Using High-Risk Adolescents' Voices to Develop a Comprehensible Cognitive Behavioral Therapy-Based Text-Message Program.                                                                                                  | <a href="#">10.1080/08964289.2016.1223597</a>  | Mental Health Diagnosis   |
| Willems    | 2024 | Mental health app boost my mood (BMM) as preventive early intervention for adolescents with (sub)clinical depressive symptoms.                                                                                            | <a href="#">10.1186/s12889-024-19666-5</a>     | Mental Health Diagnosis   |
| Williamson | 2019 | A Web-Based Self-Help Psychosocial Intervention for Adolescents Distressed by Appearance-Affecting Conditions and Injuries (Young Persons' Face IT): Feasibility Study for a Parallel Randomized Controlled Trial.        | <a href="#">10.2196/14776</a>                  | Mental Health Diagnosis   |
| Wols       | 2018 | In-Game Play Behaviours during an Applied Video Game for Anxiety Prevention Predict Successful Intervention Outcomes                                                                                                      | <a href="#">10.1007/s10862-018-9684-4</a>      | No Mental Health Outcomes |
| Zhang      | 2023 | A randomized control trial establishing the effectiveness of using interactive television-based art, music, and poetry therapies for treating the post-traumatic stress disorder of children exposed to traumatic events. | <a href="#">10.1016/j.psychres.2023.115582</a> | Wrong Intervention Format |

**Supplementary Table 2. PRISMA 2020 Checklist**

| Section and Topic             | Item # | Checklist item                                                                                                                                                                                                                                                                                       | Location where item is reported |
|-------------------------------|--------|------------------------------------------------------------------------------------------------------------------------------------------------------------------------------------------------------------------------------------------------------------------------------------------------------|---------------------------------|
| <b>TITLE</b>                  |        |                                                                                                                                                                                                                                                                                                      |                                 |
| Title                         | 1      | Identify the report as a systematic review.                                                                                                                                                                                                                                                          | 1                               |
| <b>ABSTRACT</b>               |        |                                                                                                                                                                                                                                                                                                      |                                 |
| Abstract                      | 2      | See the PRISMA 2020 for Abstracts checklist.                                                                                                                                                                                                                                                         | 1                               |
| <b>INTRODUCTION</b>           |        |                                                                                                                                                                                                                                                                                                      |                                 |
| Rationale                     | 3      | Describe the rationale for the review in the context of existing knowledge.                                                                                                                                                                                                                          | 3                               |
| Objectives                    | 4      | Provide an explicit statement of the objective(s) or question(s) the review addresses.                                                                                                                                                                                                               | 3-4                             |
| <b>METHODS</b>                |        |                                                                                                                                                                                                                                                                                                      |                                 |
| Eligibility criteria          | 5      | Specify the inclusion and exclusion criteria for the review and how studies were grouped for the syntheses.                                                                                                                                                                                          | 4-5; 24-25                      |
| Information sources           | 6      | Specify all databases, registers, websites, organisations, reference lists and other sources searched or consulted to identify studies. Specify the date when each source was last searched or consulted.                                                                                            | 22-24                           |
| Search strategy               | 7      | Present the full search strategies for all databases, registers and websites, including any filters and limits used.                                                                                                                                                                                 | 22                              |
| Selection process             | 8      | Specify the methods used to decide whether a study met the inclusion criteria of the review, including how many reviewers screened each record and each report retrieved, whether they worked independently, and if applicable, details of automation tools used in the process.                     | 22-24                           |
| Data collection process       | 9      | Specify the methods used to collect data from reports, including how many reviewers collected data from each report, whether they worked independently, any processes for obtaining or confirming data from study investigators, and if applicable, details of automation tools used in the process. | 22-24                           |
| Data items                    | 10a    | List and define all outcomes for which data were sought. Specify whether all results that were compatible with each outcome domain in each study were sought (e.g. for all measures, time points, analyses), and if not, the methods used to decide which results to collect.                        | 4-5                             |
|                               | 10b    | List and define all other variables for which data were sought (e.g. participant and intervention characteristics, funding sources). Describe any assumptions made about any missing or unclear information.                                                                                         | 22-24                           |
| Study risk of bias assessment | 11     | Specify the methods used to assess risk of bias in the included studies, including details of the tool(s) used, how many reviewers assessed each study and whether they worked independently, and if applicable, details of automation tools used in the process.                                    | 6-8; 26                         |
| Effect measures               | 12     | Specify for each outcome the effect measure(s) (e.g. risk ratio, mean difference) used in the synthesis or presentation of results.                                                                                                                                                                  | 9-16                            |
| Synthesis methods             | 13a    | Describe the processes used to decide which studies were eligible for each synthesis (e.g. tabulating the study intervention characteristics and comparing against the planned groups for each synthesis (item #5)).                                                                                 | 25-27                           |



| Section and Topic             | Item # | Checklist item                                                                                                                                                                                                                                                                       | Location where item is reported |
|-------------------------------|--------|--------------------------------------------------------------------------------------------------------------------------------------------------------------------------------------------------------------------------------------------------------------------------------------|---------------------------------|
|                               | 13b    | Describe any methods required to prepare the data for presentation or synthesis, such as handling of missing summary statistics, or data conversions.                                                                                                                                | 25-27                           |
|                               | 13c    | Describe any methods used to tabulate or visually display results of individual studies and syntheses.                                                                                                                                                                               | 25-27                           |
|                               | 13d    | Describe any methods used to synthesize results and provide a rationale for the choice(s). If meta-analysis was performed, describe the model(s), method(s) to identify the presence and extent of statistical heterogeneity, and software package(s) used.                          | 27-28                           |
|                               | 13e    | Describe any methods used to explore possible causes of heterogeneity among study results (e.g. subgroup analysis, meta-regression).                                                                                                                                                 | 27-28                           |
|                               | 13f    | Describe any sensitivity analyses conducted to assess robustness of the synthesized results.                                                                                                                                                                                         | 27                              |
| Reporting bias assessment     | 14     | Describe any methods used to assess risk of bias due to missing results in a synthesis (arising from reporting biases).                                                                                                                                                              | 26                              |
| Certainty assessment          | 15     | Describe any methods used to assess certainty (or confidence) in the body of evidence for an outcome.                                                                                                                                                                                | 27-28                           |
| <b>RESULTS</b>                |        |                                                                                                                                                                                                                                                                                      |                                 |
| Study selection               | 16a    | Describe the results of the search and selection process, from the number of records identified in the search to the number of studies included in the review, ideally using a flow diagram.                                                                                         | 4-5                             |
|                               | 16b    | Cite studies that might appear to meet the inclusion criteria, but which were excluded, and explain why they were excluded.                                                                                                                                                          | 4                               |
| Study characteristics         | 17     | Cite each included study and present its characteristics.                                                                                                                                                                                                                            | 6                               |
| Risk of bias in studies       | 18     | Present assessments of risk of bias for each included study.                                                                                                                                                                                                                         | 6-8                             |
| Results of individual studies | 19     | For all outcomes, present, for each study: (a) summary statistics for each group (where appropriate) and (b) an effect estimate and its precision (e.g. confidence/credible interval), ideally using structured tables or plots.                                                     | 9-16                            |
| Results of syntheses          | 20a    | For each synthesis, briefly summarise the characteristics and risk of bias among contributing studies.                                                                                                                                                                               | 9-16                            |
|                               | 20b    | Present results of all statistical syntheses conducted. If meta-analysis was done, present for each the summary estimate and its precision (e.g. confidence/credible interval) and measures of statistical heterogeneity. If comparing groups, describe the direction of the effect. | 9-16                            |
|                               | 20c    | Present results of all investigations of possible causes of heterogeneity among study results.                                                                                                                                                                                       | 9-16                            |
|                               | 20d    | Present results of all sensitivity analyses conducted to assess the robustness of the synthesized results.                                                                                                                                                                           | 9-16                            |
| Reporting biases              | 21     | Present assessments of risk of bias due to missing results (arising from reporting biases) for each synthesis assessed.                                                                                                                                                              | 9-16                            |
| Certainty of evidence         | 22     | Present assessments of certainty (or confidence) in the body of evidence for each outcome assessed.                                                                                                                                                                                  | 9-16                            |

| Section and Topic                              | Item # | Checklist item                                                                                                                                                                                                                             | Location where item is reported |
|------------------------------------------------|--------|--------------------------------------------------------------------------------------------------------------------------------------------------------------------------------------------------------------------------------------------|---------------------------------|
| <b>DISCUSSION</b>                              |        |                                                                                                                                                                                                                                            |                                 |
| Discussion                                     | 23a    | Provide a general interpretation of the results in the context of other evidence.                                                                                                                                                          | 16-19                           |
|                                                | 23b    | Discuss any limitations of the evidence included in the review.                                                                                                                                                                            | 22                              |
|                                                | 23c    | Discuss any limitations of the review processes used.                                                                                                                                                                                      | 22                              |
|                                                | 23d    | Discuss implications of the results for practice, policy, and future research.                                                                                                                                                             | 19-22                           |
| <b>OTHER INFORMATION</b>                       |        |                                                                                                                                                                                                                                            |                                 |
| Registration and protocol                      | 24a    | Provide registration information for the review, including register name and registration number, or state that the review was not registered.                                                                                             | 22                              |
|                                                | 24b    | Indicate where the review protocol can be accessed, or state that a protocol was not prepared.                                                                                                                                             | 22                              |
|                                                | 24c    | Describe and explain any amendments to information provided at registration or in the protocol.                                                                                                                                            | 22                              |
| Support                                        | 25     | Describe sources of financial or non-financial support for the review, and the role of the funders or sponsors in the review.                                                                                                              | 28                              |
| Competing interests                            | 26     | Declare any competing interests of review authors.                                                                                                                                                                                         | 29                              |
| Availability of data, code and other materials | 27     | Report which of the following are publicly available and where they can be found: template data collection forms; data extracted from included studies; data used for all analyses; analytic code; any other materials used in the review. | 28                              |

From: Page MJ, McKenzie JE, Bossuyt PM, Boutron I, Hoffmann TC, Mulrow CD, et al. The PRISMA 2020 statement: an updated guideline for reporting systematic reviews. BMJ 2021;372:n71. doi: 10.1136/bmj.n71. This work is licensed under CC BY 4.0. To view a copy of this license, visit <https://creativecommons.org/licenses/by/4.0/>

**Supplementary Table 3. Representative Search Strategy**

**Ovid MEDLINE(R) and In-Process, In-Data-Review & Other Non-Indexed Citations  
<1946 to July 03, 2024>**

| # | Searches                                                                                                                                                                                                                                                                                                                                                                              | Results | Type     |
|---|---------------------------------------------------------------------------------------------------------------------------------------------------------------------------------------------------------------------------------------------------------------------------------------------------------------------------------------------------------------------------------------|---------|----------|
| 1 | (Promot* or prevent* or benefit* or develop* or reduce or help* or effectiveness or project or universal or experiences or (skill* adj2 build*) or (teacher adj2 led) or (school adj2 based) or "school-based" or "after school").ti.                                                                                                                                                 | 1780389 | Advanced |
| 2 | (trials or trial or intervention or app evaluat* or application* or (app* adj2 mental health) or (app* adj2 restructuring) or program* or (mobile adj2 app)).ti.                                                                                                                                                                                                                      | 1095505 | Advanced |
| 3 | (mind or mindful* or psychosocial* or (mental adj2 (health or well-being or wellness or "well being"))) or (emotional* adj2 (health or well-being or wellbeing or wellness or "well being"))) or resilien* or (cognit* adj2 (music or musical or skill or skills or ability or abilities)) or (life adj2 skill*) or behaviour* or behavior* or stress* or suicide or antecedents).ti. | 882996  | Advanced |
| 4 | (infan* or child* or adolescen* or youth* or student* or girl or girls or boy or boys or teen*).ti.                                                                                                                                                                                                                                                                                   | 1496824 | Advanced |
| 5 | 1 and 2 and 3 [****Base clinical set no age groups****]                                                                                                                                                                                                                                                                                                                               | 8746    | Advanced |
| 6 | limit 5 to "all child (0 to 18 years)"                                                                                                                                                                                                                                                                                                                                                | 2802    | Advanced |
| 7 | 6 or (4 and 5) [****Final results version 1****]                                                                                                                                                                                                                                                                                                                                      | 3448    | Advanced |

**Embase <1974 to 2024 July 03>**

| # | Searches                                                                                                                                                                                                                              | Results | Type     |
|---|---------------------------------------------------------------------------------------------------------------------------------------------------------------------------------------------------------------------------------------|---------|----------|
| 1 | (Promot* or prevent* or benefit* or develop* or reduce or help* or effectiveness or project or universal or experiences or (skill* adj2 build*) or (teacher adj2 led) or (school adj2 based) or "school-based" or "after school").ti. | 2139219 | Advanced |
| 2 | (trials or trial or intervention or app evaluat* or application* or (app* adj2 mental health) or (app* adj2 restructuring) or program* or (mobile adj2 app)).ti.                                                                      | 1382020 | Advanced |

|   |                                                                                                                                                                                                                                                                                                                                                                                      |         |          |
|---|--------------------------------------------------------------------------------------------------------------------------------------------------------------------------------------------------------------------------------------------------------------------------------------------------------------------------------------------------------------------------------------|---------|----------|
| 3 | (mind or mindful* or psychosocial* or (mental adj2 (health or well-being or wellness or "well being"))) or (emotional* adj2 (health or well-being or wellbeing or wellness or "well being")) or resilien* or (cognit* adj2 (music or musical or skill or skills or ability or abilities)) or (life adj2 skill*) or behaviour* or behavior* or stress* or suicide or antecedents).ti. | 999199  | Advanced |
| 4 | (infan* or child* or adolescen* or youth* or student* or girl or girls or boy or boys or teen*).ti.                                                                                                                                                                                                                                                                                  | 1726409 | Advanced |
| 5 | 1 and 2 and 3 [****Base clinical set no age groups****]                                                                                                                                                                                                                                                                                                                              | 10069   | Advanced |
| 6 | limit 5 to (infant <to one year> or child <unspecified age> or preschool child <1 to 6 years> or school child <7 to 12 years> or adolescent <13 to 17 years>)                                                                                                                                                                                                                        | 3068    | Advanced |
| 7 | 6 or (4 and 5) [****Final results version 1****]                                                                                                                                                                                                                                                                                                                                     | 3621    | Advanced |

#### APA PsycInfo <1806 to June Week 4 2024>

| # | Searches                                                                                                                                                                                                                                                                                                                                                                             | Results | Type     |
|---|--------------------------------------------------------------------------------------------------------------------------------------------------------------------------------------------------------------------------------------------------------------------------------------------------------------------------------------------------------------------------------------|---------|----------|
| 1 | (Promot* or prevent* or benefit* or develop* or reduce or help* or effectiveness or project or universal or experiences or (skill* adj2 build*) or (teacher adj2 led) or (school adj2 based) or "school-based" or "after school").ti.                                                                                                                                                | 458946  | Advanced |
| 2 | (trials or trial or intervention or app evaluat* or application* or (app* adj2 mental health) or (app* adj2 restructuring) or program* or (mobile adj2 app)).ti.                                                                                                                                                                                                                     | 233428  | Advanced |
| 3 | (mind or mindful* or psychosocial* or (mental adj2 (health or well-being or wellness or "well being"))) or (emotional* adj2 (health or well-being or wellbeing or wellness or "well being")) or resilien* or (cognit* adj2 (music or musical or skill or skills or ability or abilities)) or (life adj2 skill*) or behaviour* or behavior* or stress* or suicide or antecedents).ti. | 580825  | Advanced |
| 4 | (infan* or child* or adolescen* or youth* or student* or girl or girls or boy or boys or teen*).ti.                                                                                                                                                                                                                                                                                  | 800582  | Advanced |
| 5 | 1 and 2 and 3 [****Base clinical set no age groups****]                                                                                                                                                                                                                                                                                                                              | 7565    | Advanced |
| 6 | limit 5 to (100 childhood <birth to age 12 yrs> or 200 adolescence <age 13 to 17 yrs>)                                                                                                                                                                                                                                                                                               | 2628    | Advanced |
| 7 | 6 or (4 and 5) [****Final results version 1****]                                                                                                                                                                                                                                                                                                                                     | 3392    | Advanced |

## Supplementary Figures 1-16. 16 Forest Plots with Risk of Bias Summary

### Emotion – Hybrid – Post-Intervention (Immediate) < 1-month

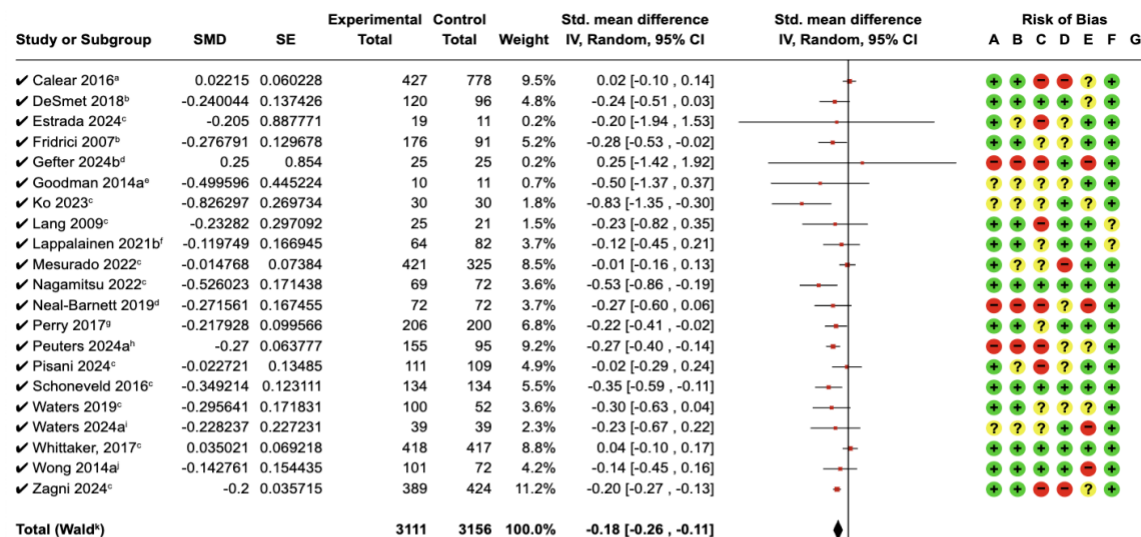

#### Footnotes

<sup>a</sup>Hybrid - Between - Randomized (E-GAD Arm measured at posttest)

<sup>b</sup>Hybrid - Between - Randomized

<sup>c</sup>Hybrid - Between - Randomized

<sup>d</sup>Hybrid - Within - Non-Randomized

<sup>e</sup>Hybrid (9th grade group sessions) - Within-Randomized; prettest (control) posttest (intervention)

<sup>f</sup>Hybrid (iACTface)- Between - Randomized

<sup>g</sup>Hybrid - Between - Randomized - Posttest

<sup>h</sup>Hybrid (In-School) - Between - quasi-Randomized

<sup>i</sup>Hybrid - Within - Non-Randomized; In-person + remote real time.

<sup>j</sup>Hybrid (Depression Intervention) - Between - Randomized

<sup>k</sup>CI calculated by Wald-type method.

<sup>l</sup> $\text{Tau}^2$  calculated by DerSimonian and Laird method.

#### Risk of bias legend

(A) Random sequence generation (selection bias)

(B) Allocation concealment (selection bias)

(C) Blinding of participants and personnel (performance bias)

(D) Blinding of outcome assessment (detection bias)

(E) Incomplete outcome data (attrition bias)

(F) Selective reporting (reporting bias)

(G) Other bias

## Emotion – Virtual – Post-Intervention (Immediate) < 1-month

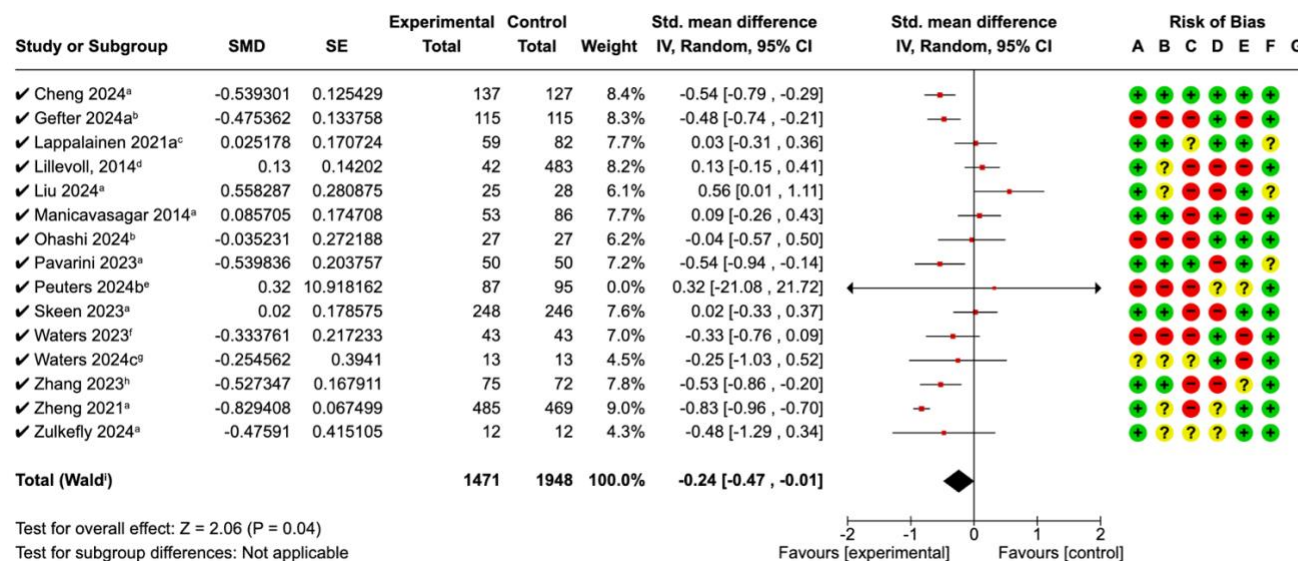

### Footnotes

<sup>a</sup>Virtual - Between - Randomized

<sup>b</sup>Virtual - Within - Non-Randomized

<sup>c</sup>Virtual (iACT) - Between - Randomized

<sup>d</sup>Virtual - Between - Randomized - tailored e-mail reminder (but in end all measured) posttest

<sup>e</sup>Virtual - Between - Quasi-Randomized

<sup>f</sup>Hybrid - Within - Non-Randomized

<sup>g</sup>Virtual - Within - Non-Randomized; Remote Delivery only

<sup>h</sup>Hybrid - Between - Randomized

<sup>i</sup>CI calculated by Wald-type method.

<sup>j</sup>Tau<sup>2</sup> calculated by DerSimonian and Laird method.

### Risk of bias legend

(A) Random sequence generation (selection bias)

(B) Allocation concealment (selection bias)

(C) Blinding of participants and personnel (performance bias)

(D) Blinding of outcome assessment (detection bias)

(E) Incomplete outcome data (attrition bias)

(F) Selective reporting (reporting bias)

(G) Other bias

## Emotion – Hybrid – Follow-Up ≥ 1-month to ≤ 6-months

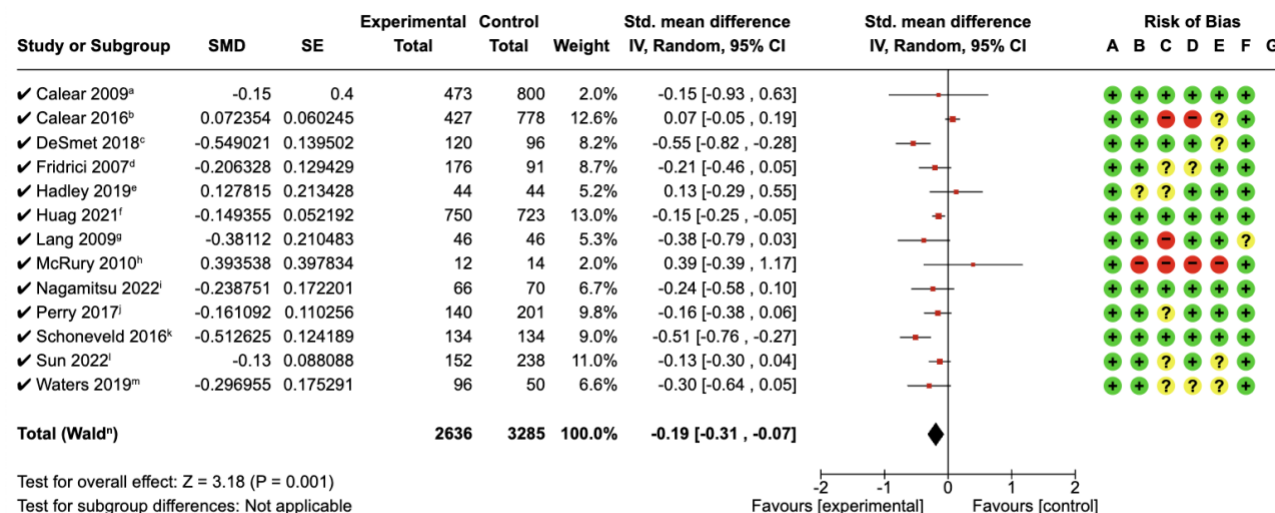

### Footnotes

<sup>a</sup>Hybrid - Between - Randomized - posttest measured at 1-month

<sup>b</sup>Hybrid - Between - Randomized (E-GAD Arm) measured at 6-months posttest

<sup>c</sup>Hybrid - Between - Randomized; Posttest measured at 4-weeks (T2)

<sup>d</sup>Hybrid - Between - Randomized; Follow-up at 2-months.

<sup>e</sup>Hybrid - Between - Randomized; Posttest measured at 3-month follow-up from intervention

<sup>f</sup>Hybrid - Between - Randomized; Posttest measured at 6-months after intervention

<sup>g</sup>Hybrid - Crossover-randomized from baseline to 3-month follow-up; since participants all received the intervention, we entered the total number of participants for both arms.

<sup>h</sup>Hybrid - Between - Randomized; Follow-up measured at 12-weeks.

<sup>i</sup>Hybrid - Between - Randomized; Follow-up at 4-months.

<sup>j</sup>Hybrid - Between - Randomized - 6-month follow-up

<sup>k</sup>Hybrid - Between - Randomized; pretest to 3-month follow-up.

<sup>l</sup>Hybrid - Between-Randomized; Follow-up at (T4) 3-months.

<sup>m</sup>Hybrid - Between - Randomized; Follow-up at 6-months.

<sup>n</sup>CI calculated by Wald-type method.

<sup>o</sup>Tau<sup>2</sup> calculated by DerSimonian and Laird method.

### Risk of bias legend

(A) Random sequence generation (selection bias)

(B) Allocation concealment (selection bias)

(C) Blinding of participants and personnel (performance bias)

(D) Blinding of outcome assessment (detection bias)

(E) Incomplete outcome data (attrition bias)

(F) Selective reporting (reporting bias)

(G) Other bias

## Emotion – Virtual – Follow-Up ≥ 1-month to ≤ 6-months

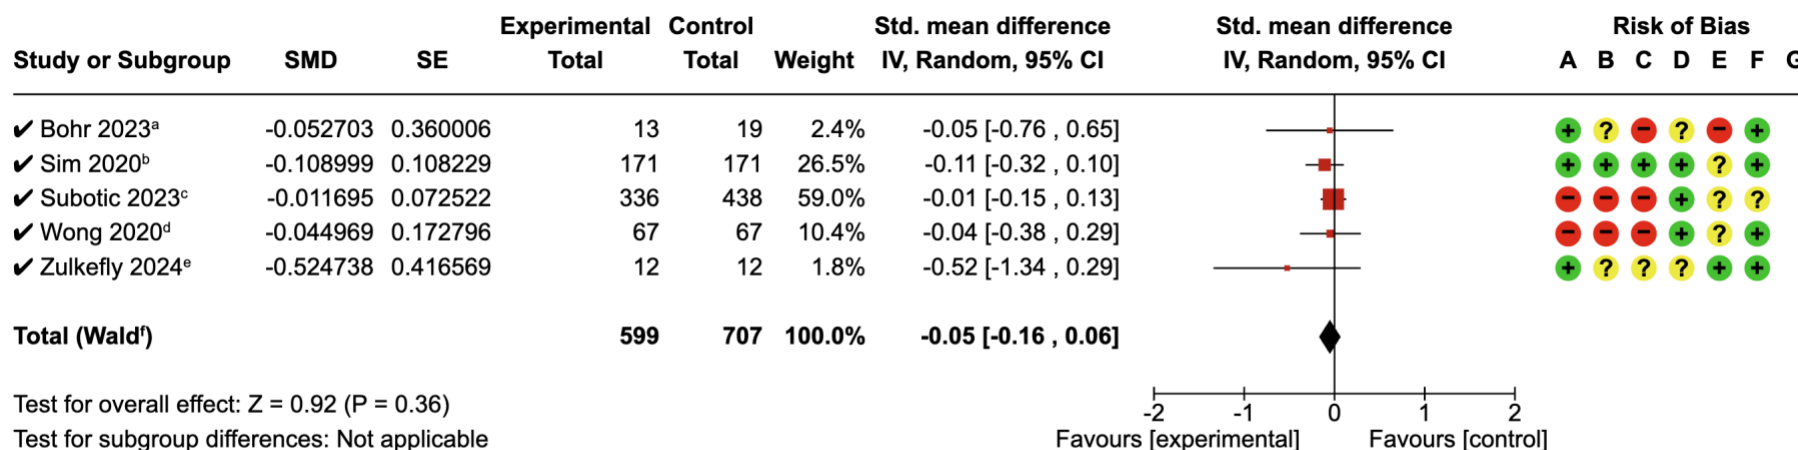

### Footnotes

- <sup>a</sup>Virtual - Between - Randomized; Postintervention at 7-weeks.  
<sup>b</sup>Virtual - Between - Randomized; Postintervention measured at 3-months.  
<sup>c</sup>Virtual - Within - Non-Randomized; Posttest measured at 1-2-months post intervention  
<sup>d</sup>Virtual - Within - Non-Randomized; Posttest measured at 1-month.  
<sup>e</sup>Virtual - Between - Randomized; Follow-up at 1-month.  
<sup>f</sup>CI calculated by Wald-type method.  
<sup>g</sup>Tau<sup>2</sup> calculated by DerSimonian and Laird method.

### Risk of bias legend

- (A) Random sequence generation (selection bias)  
 (B) Allocation concealment (selection bias)  
 (C) Blinding of participants and personnel (performance bias)  
 (D) Blinding of outcome assessment (detection bias)  
 (E) Incomplete outcome data (attrition bias)  
 (F) Selective reporting (reporting bias)  
 (G) Other bias



## Behaviour – Hybrid – Post-Intervention (Immediate) < 1-month

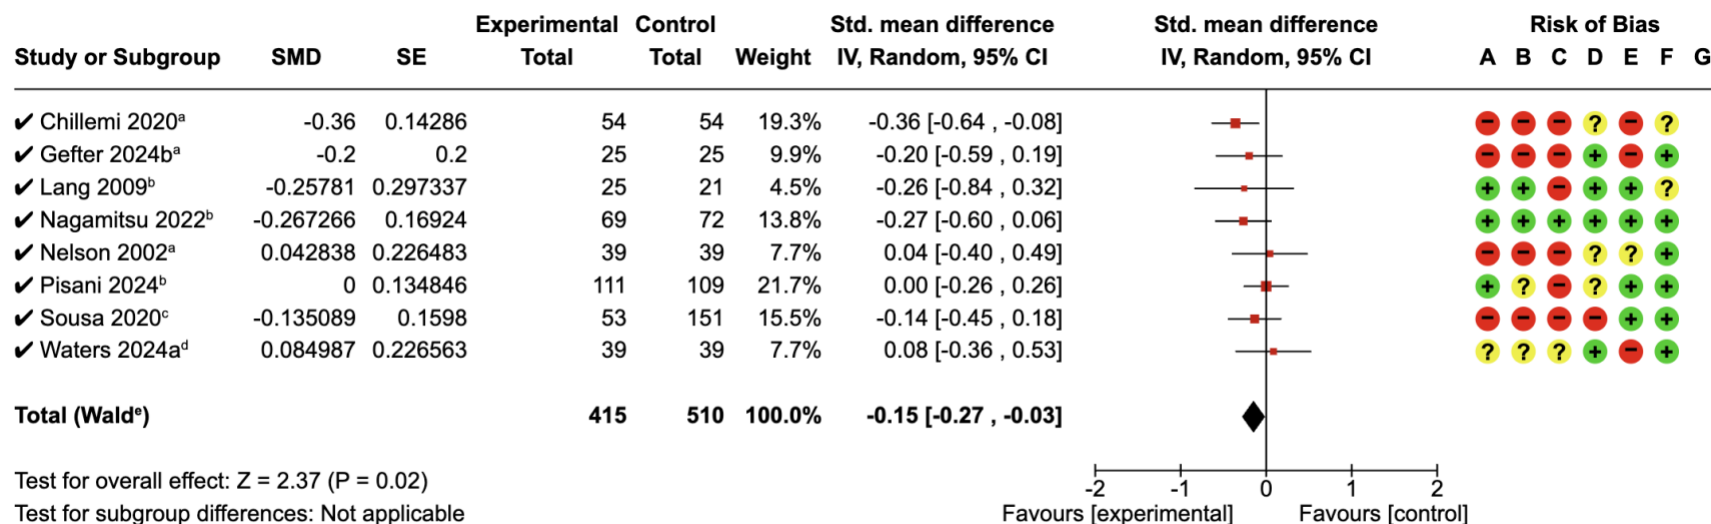

### Footnotes

<sup>a</sup>Hybrid - Within - Non-Randomized

<sup>b</sup>Hybrid - Between - Randomized

<sup>c</sup>Hybrid - Between - Non-Randomized

<sup>d</sup>Hybrid - Within - Non-Randomized; In-person + remote real time.

<sup>e</sup>CI calculated by Wald-type method.

<sup>f</sup>Tau<sup>2</sup> calculated by DerSimonian and Laird method.

### Risk of bias legend

(A) Random sequence generation (selection bias)

(B) Allocation concealment (selection bias)

(C) Blinding of participants and personnel (performance bias)

(D) Blinding of outcome assessment (detection bias)

(E) Incomplete outcome data (attrition bias)

(F) Selective reporting (reporting bias)

(G) Other bias

## Behaviour – Virtual – Post-Intervention (Immediate) < 1-month

| Study or Subgroup               | SMD       | SE       | Experimental Control |             | Weight        | Std. mean difference<br>IV, Random, 95% CI | Std. mean difference<br>IV, Random, 95% CI | Risk of Bias |   |   |   |   |   |   |
|---------------------------------|-----------|----------|----------------------|-------------|---------------|--------------------------------------------|--------------------------------------------|--------------|---|---|---|---|---|---|
|                                 |           |          | Total                | Total       |               |                                            |                                            | A            | B | C | D | E | F | G |
| ✓ Benzi 2023 <sup>a</sup>       | -0.824794 | 0.30175  | 24                   | 24          | 8.0%          | -0.82 [-1.42, -0.23]                       |                                            | +            | + | + | + | + | + | + |
| ✓ Gefter 2024a <sup>a</sup>     | -0.435    | 0.108    | 115                  | 115         | 15.8%         | -0.43 [-0.65, -0.22]                       |                                            | +            | + | + | + | + | + | + |
| ✓ Morawska 2006 <sup>a</sup>    | -0.654607 | 0.165535 | 77                   | 77          | 13.3%         | -0.65 [-0.98, -0.33]                       |                                            | +            | + | + | + | + | + | + |
| ✓ Skeen 2023 <sup>b</sup>       | -0.03     | 0.21429  | 248                  | 246         | 11.1%         | -0.03 [-0.45, 0.39]                        |                                            | +            | + | + | + | + | + | + |
| ✓ Subotic 2023 <sup>a</sup>     | 0.017724  | 0.072221 | 341                  | 438         | 17.2%         | 0.02 [-0.12, 0.16]                         |                                            | +            | + | + | + | + | + | + |
| ✓ Waters 2023 <sup>a</sup>      | -0.225993 | 0.216386 | 43                   | 43          | 11.1%         | -0.23 [-0.65, 0.20]                        |                                            | +            | + | + | + | + | + | + |
| ✓ Waters 2024c <sup>c</sup>     | 0.185203  | 0.393222 | 13                   | 13          | 5.8%          | 0.19 [-0.59, 0.96]                         |                                            | +            | + | + | + | + | + | + |
| ✓ Wolchik 2022 <sup>b</sup>     | -0.172416 | 0.180174 | 81                   | 50          | 12.6%         | -0.17 [-0.53, 0.18]                        |                                            | +            | + | + | + | + | + | + |
| ✓ Zulkefly 2024 <sup>b</sup>    | -0.707321 | 0.423246 | 12                   | 12          | 5.2%          | -0.71 [-1.54, 0.12]                        |                                            | +            | + | + | + | + | + | + |
| <b>Total (Wald<sup>d</sup>)</b> |           |          | <b>954</b>           | <b>1018</b> | <b>100.0%</b> | <b>-0.29 [-0.52, -0.07]</b>                |                                            |              |   |   |   |   |   |   |

Test for overall effect:  $Z = 2.59$  ( $P = 0.010$ )

Test for subgroup differences: Not applicable

Heterogeneity:  $\text{Tau}^2$  ( $\text{DL}^e$ ) = 0.07;  $\text{Chi}^2 = 28.71$ ,  $\text{df} = 8$  ( $P = 0.0004$ );  $I^2 = 72\%$

### Footnotes

<sup>a</sup>Virtual - Within - Non-Randomized

<sup>b</sup>Virtual - Between - Randomized

<sup>c</sup>Hybrid - Within - Non-Randomized; Remote delivery only.

<sup>d</sup>CI calculated by Wald-type method.

<sup>e</sup> $\text{Tau}^2$  calculated by DerSimonian and Laird method.

### Risk of bias legend

(A) Random sequence generation (selection bias)

(B) Allocation concealment (selection bias)

(C) Blinding of participants and personnel (performance bias)

(D) Blinding of outcome assessment (detection bias)

(E) Incomplete outcome data (attrition bias)

(F) Selective reporting (reporting bias)

(G) Other bias

## Behaviour – Hybrid – Follow-Up $\geq 1$ -month to $\leq 6$ -months

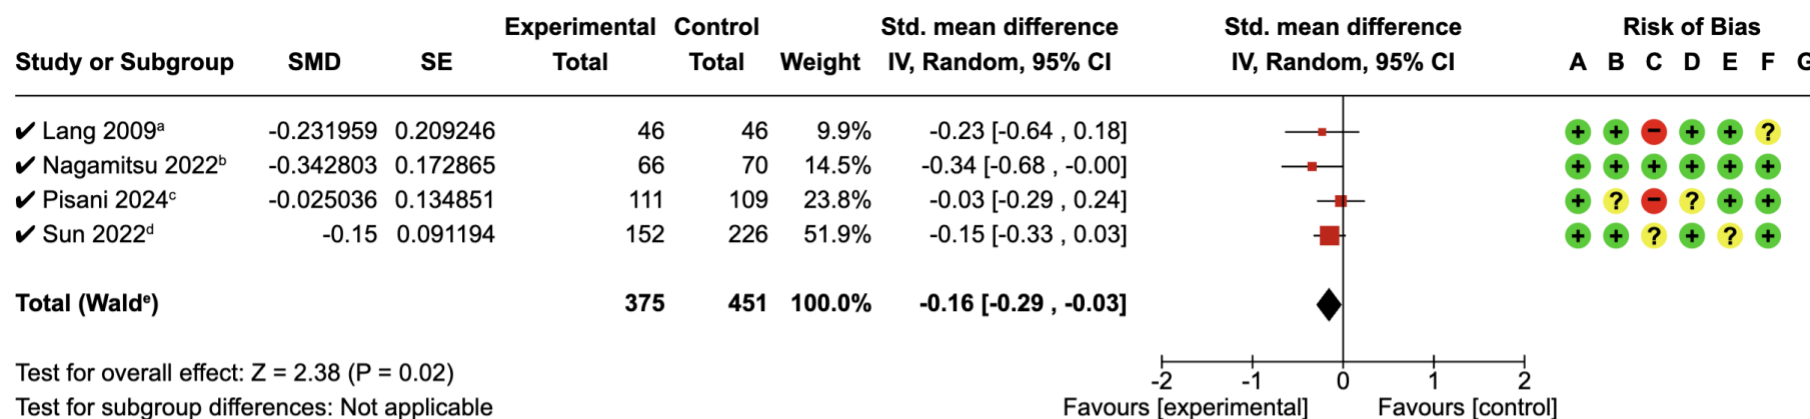

### Footnotes

<sup>a</sup>Hybrid - Crossover-randomized from baseline to 3-month follow-up; since participants all received the intervention, we entered the total number of participants for both arms.

<sup>b</sup>Hybrid - Between - Randomized; Follow-up at 4-months.

<sup>c</sup>Hybrid - Between - Randomized - follow-up at 3-months.

<sup>d</sup>Hybrid - Between - Randomized; Follow-up measured at T4 - 3-months

<sup>e</sup>CI calculated by Wald-type method.

<sup>f</sup> $\text{Tau}^2$  calculated by DerSimonian and Laird method.

### Risk of bias legend

(A) Random sequence generation (selection bias)

(B) Allocation concealment (selection bias)

(C) Blinding of participants and personnel (performance bias)

(D) Blinding of outcome assessment (detection bias)

(E) Incomplete outcome data (attrition bias)

(F) Selective reporting (reporting bias)

(G) Other bias

## Behaviour – Virtual – Follow-Up $\geq 1$ -month to $\leq 6$ -months

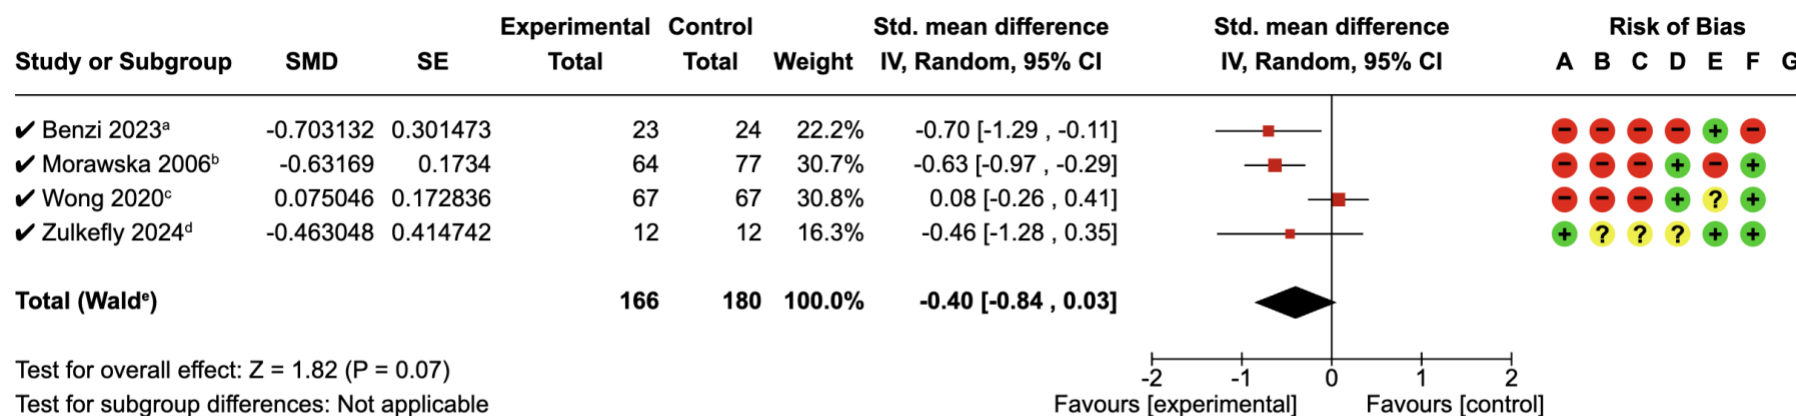

### Footnotes

<sup>a</sup>Virtual - Within - Non-Randomized; T0-T2 (baseline to 2-month follow-up)

<sup>b</sup>Virtual - Within - Non-Randomized; pretest to follow-up measured at 3-months

<sup>c</sup>Virtual - Within - Non-Randomized; Posttest measured at 1-month.

<sup>d</sup>Virtual - Between - Randomized; Follow-up at 1-month.

<sup>e</sup>CI calculated by Wald-type method.

<sup>f</sup> $\tau^2$  calculated by DerSimonian and Laird method.

### Risk of bias legend

(A) Random sequence generation (selection bias)

(B) Allocation concealment (selection bias)

(C) Blinding of participants and personnel (performance bias)

(D) Blinding of outcome assessment (detection bias)

(E) Incomplete outcome data (attrition bias)

(F) Selective reporting (reporting bias)

(G) Other bias

## Social – Hybrid – Post-Intervention (Immediate) < 1-month

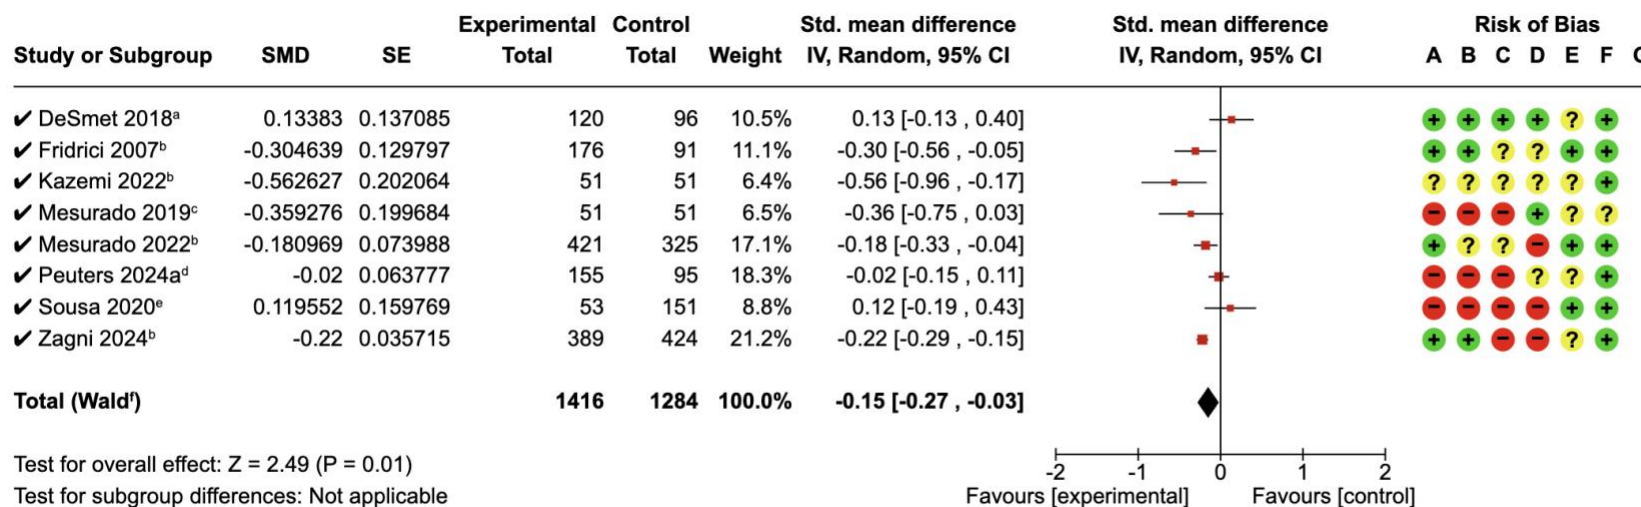

### Footnotes

<sup>a</sup>Hybrid - Between - Randomized

<sup>b</sup>Hybrid - Between - Randomized

<sup>c</sup>Hybrid - Within - Non-Randomized

<sup>d</sup>Hybrid (In-person) - Between - quasi-Randomized

<sup>e</sup>Hybrid - Between - Non-Randomized

<sup>f</sup>CI calculated by Wald-type method.

<sup>g</sup>Tau<sup>2</sup> calculated by DerSimonian and Laird method.

### Risk of bias legend

(A) Random sequence generation (selection bias)

(B) Allocation concealment (selection bias)

(C) Blinding of participants and personnel (performance bias)

(D) Blinding of outcome assessment (detection bias)

(E) Incomplete outcome data (attrition bias)

(F) Selective reporting (reporting bias)

(G) Other bias

## Social – Virtual – Post-Intervention (Immediate) < 1-month

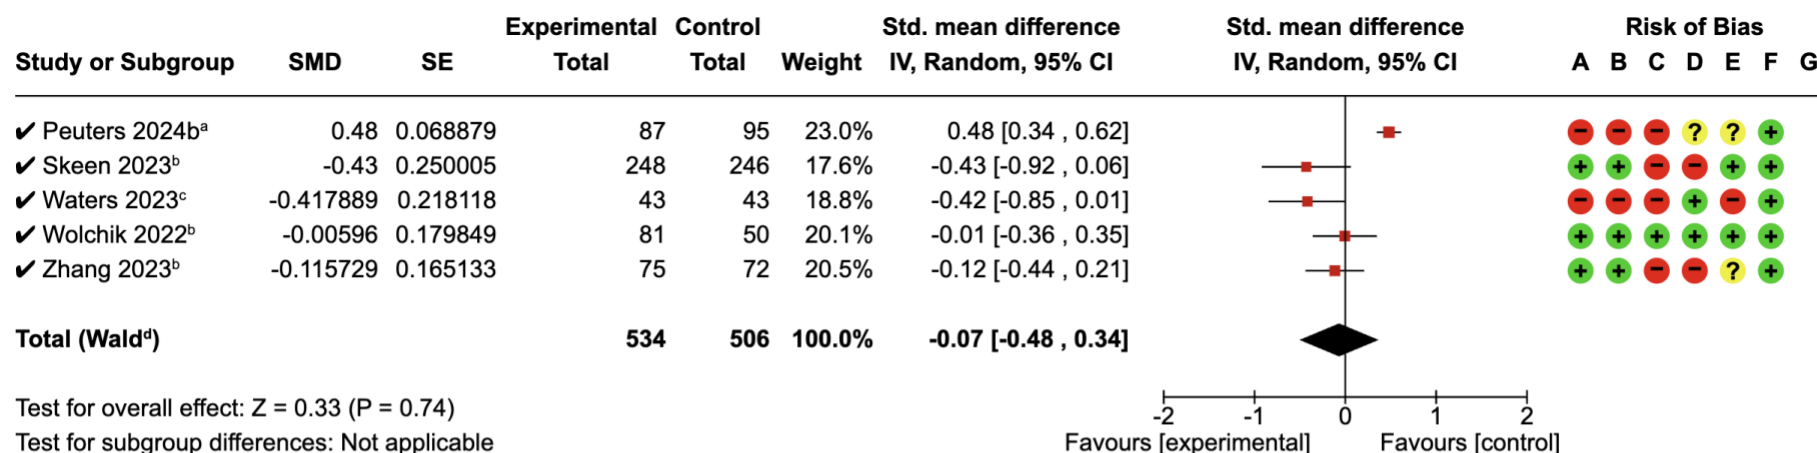

### Footnotes

<sup>a</sup>Virtual (Remote due to pandemic) - Between - quasi-Randomized

<sup>b</sup>Virtual - Between - Randomized

<sup>c</sup>Virtual - Within - Non-Randomized

<sup>d</sup>CI calculated by Wald-type method.

<sup>e</sup> $\tau^2$  calculated by DerSimonian and Laird method.

### Risk of bias legend

(A) Random sequence generation (selection bias)

(B) Allocation concealment (selection bias)

(C) Blinding of participants and personnel (performance bias)

(D) Blinding of outcome assessment (detection bias)

(E) Incomplete outcome data (attrition bias)

(F) Selective reporting (reporting bias)

(G) Other bias

## Social – Hybrid – Follow-Up $\geq$ 1-month to $\leq$ 6-months

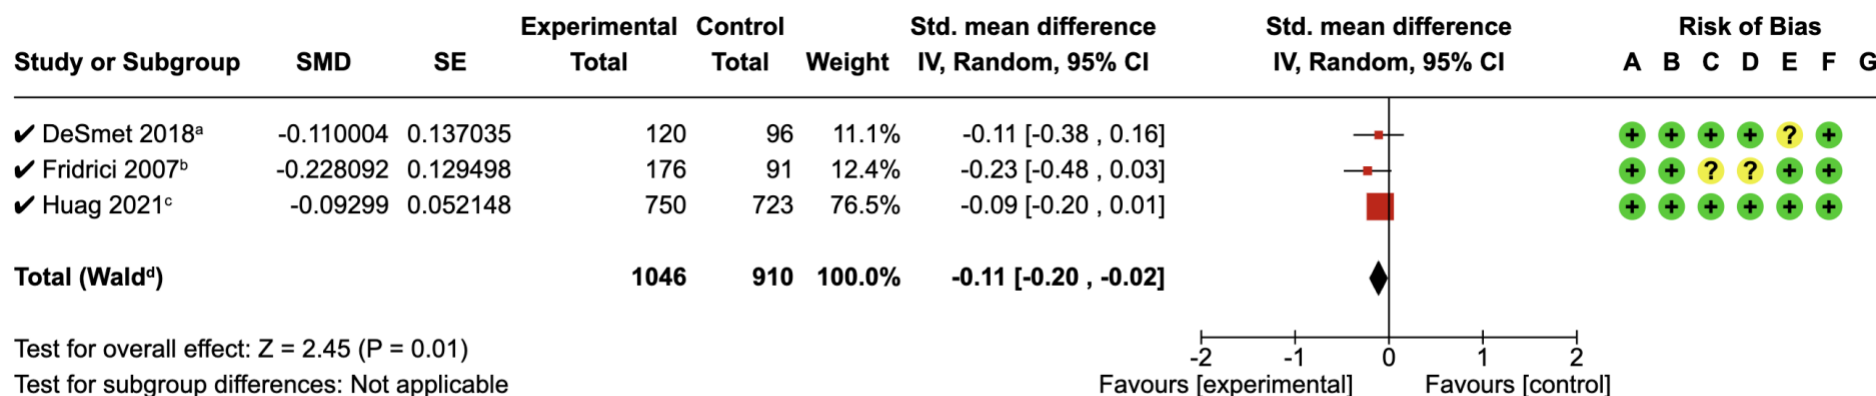

### Footnotes

<sup>a</sup>Hybrid - Between - Randomized; Posttest measured at 4-weeks (T2)

<sup>b</sup>Hybrid - Between - Randomized; Follow-up at 2-months.

<sup>c</sup>Hybrid - Between - Randomized; Posttest measured at 6-months.

<sup>d</sup>CI calculated by Wald-type method.

<sup>e</sup> $\tau^2$  calculated by DerSimonian and Laird method.

### Risk of bias legend

(A) Random sequence generation (selection bias)

(B) Allocation concealment (selection bias)

(C) Blinding of participants and personnel (performance bias)

(D) Blinding of outcome assessment (detection bias)

(E) Incomplete outcome data (attrition bias)

(F) Selective reporting (reporting bias)

(G) Other bias



## Social – Virtual – Follow-Up ≥ 1-month to ≤ 6-months

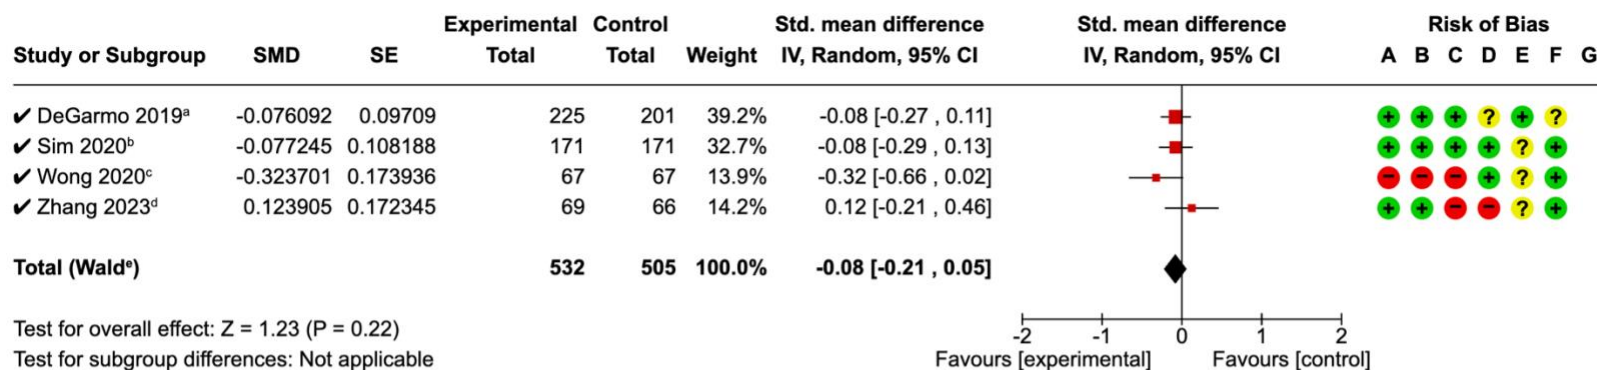

### Footnotes

<sup>a</sup>Virtual - Between - Randomized; Posttest measured at 12-weeks (Time 3) follow-up. Posttest (Time 2) at 7-weeks not provided.

<sup>b</sup>Virtual - Between - Randomized; Posttest measured at 3-months.

<sup>c</sup>Virtual - Within - Non-Randomized; Follow-up from baseline to 6-months.

<sup>d</sup>Virtual - Between - Randomized; Follow-up at 6-months.

\*CI calculated by Wald-type method.

<sup>†</sup> $\text{Tau}^2$  calculated by DerSimonian and Laird method.

### Risk of bias legend

- (A) Random sequence generation (selection bias)
- (B) Allocation concealment (selection bias)
- (C) Blinding of participants and personnel (performance bias)
- (D) Blinding of outcome assessment (detection bias)
- (E) Incomplete outcome data (attrition bias)
- (F) Selective reporting (reporting bias)
- (G) Other bias



## Cognitive – Hybrid – Post-Intervention (Immediate) < 1-month

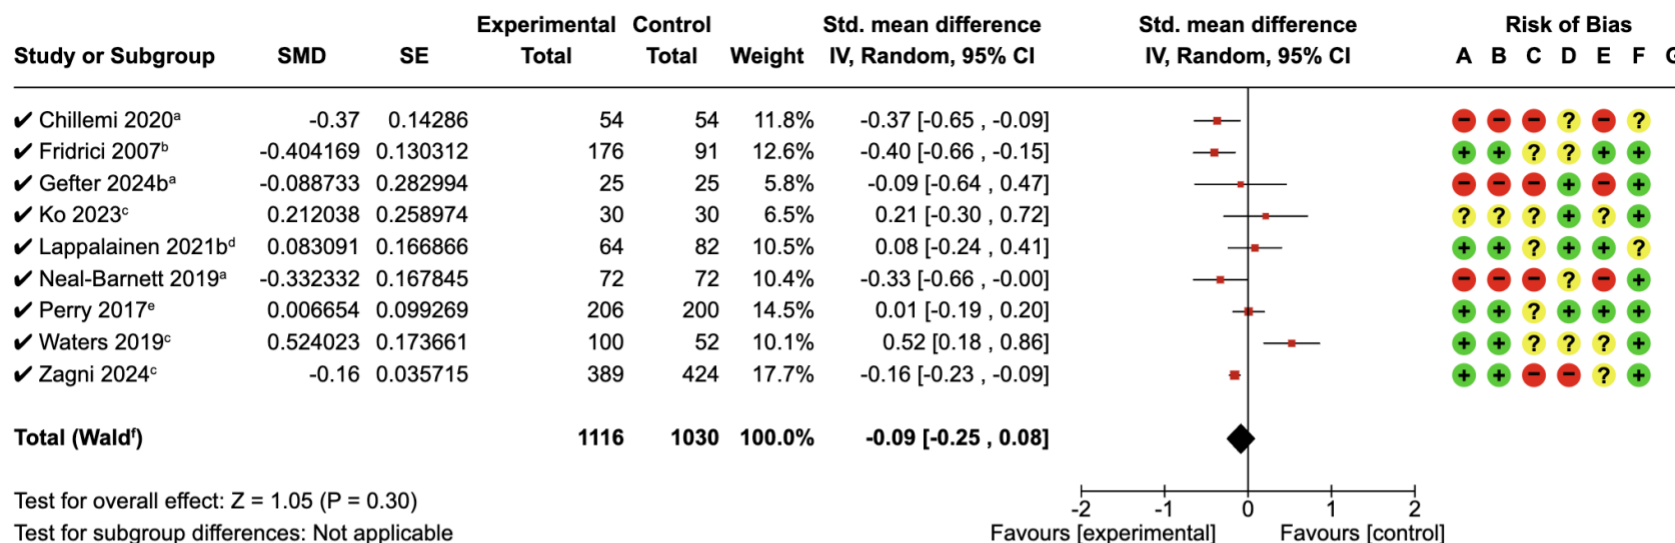

### Footnotes

<sup>a</sup>Hybrid - Within - Non-Randomized

<sup>b</sup>Hybrid - Between - Randomized

<sup>c</sup>Hybrid - Between - Randomized

<sup>d</sup>Hybrid (iACTface) - Between - Randomized

<sup>e</sup>Hybrid - Between - Randomized - Posttest

<sup>f</sup>CI calculated by Wald-type method.

<sup>g</sup>Tau<sup>2</sup> calculated by DerSimonian and Laird method.

### Risk of bias legend

(A) Random sequence generation (selection bias)

(B) Allocation concealment (selection bias)

(C) Blinding of participants and personnel (performance bias)

(D) Blinding of outcome assessment (detection bias)

(E) Incomplete outcome data (attrition bias)

(F) Selective reporting (reporting bias)

(G) Other bias

## Cognitive – Virtual – Post-Intervention (Immediate) < 1-month

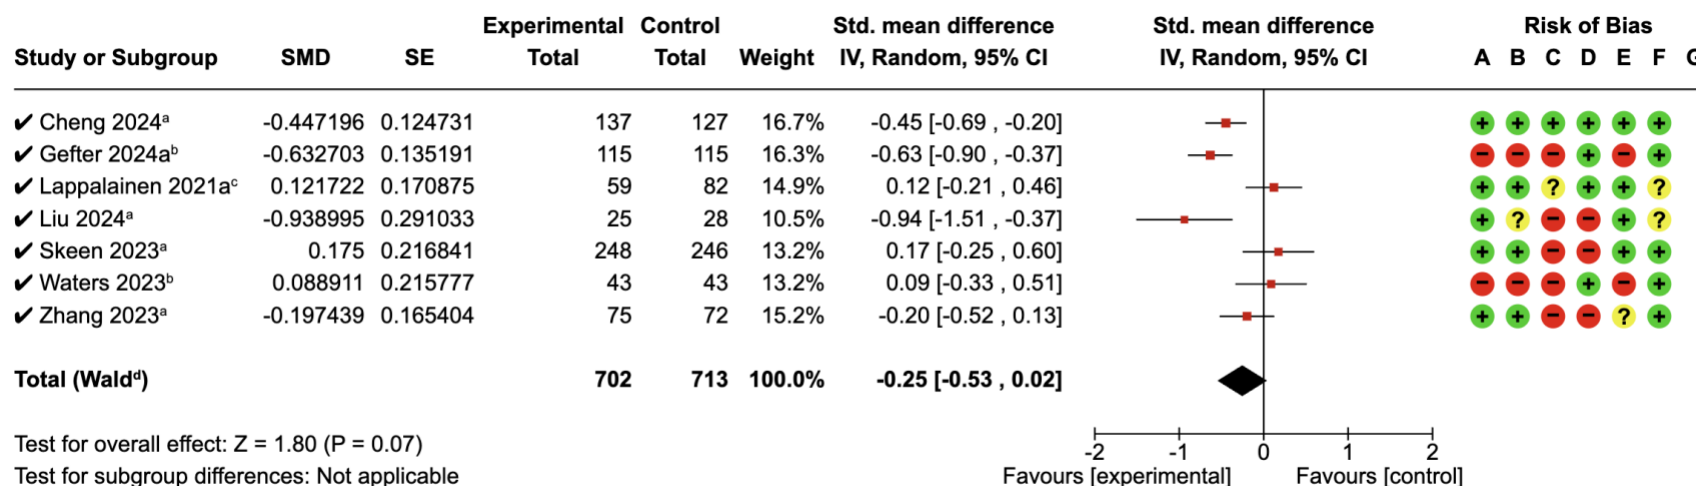

### Footnotes

<sup>a</sup>Virtual - Between - Randomized

<sup>b</sup>Virtual - Within - Non-Randomized

<sup>c</sup>Virtual (iACT) - Between - Randomized

<sup>d</sup>CI calculated by Wald-type method.

<sup>e</sup>Tau<sup>2</sup> calculated by DerSimonian and Laird method.

### Risk of bias legend

(A) Random sequence generation (selection bias)

(B) Allocation concealment (selection bias)

(C) Blinding of participants and personnel (performance bias)

(D) Blinding of outcome assessment (detection bias)

(E) Incomplete outcome data (attrition bias)

(F) Selective reporting (reporting bias)

(G) Other bias

## Cognitive – Hybrid – Follow-Up ≥ 1-month to ≤ 6-months

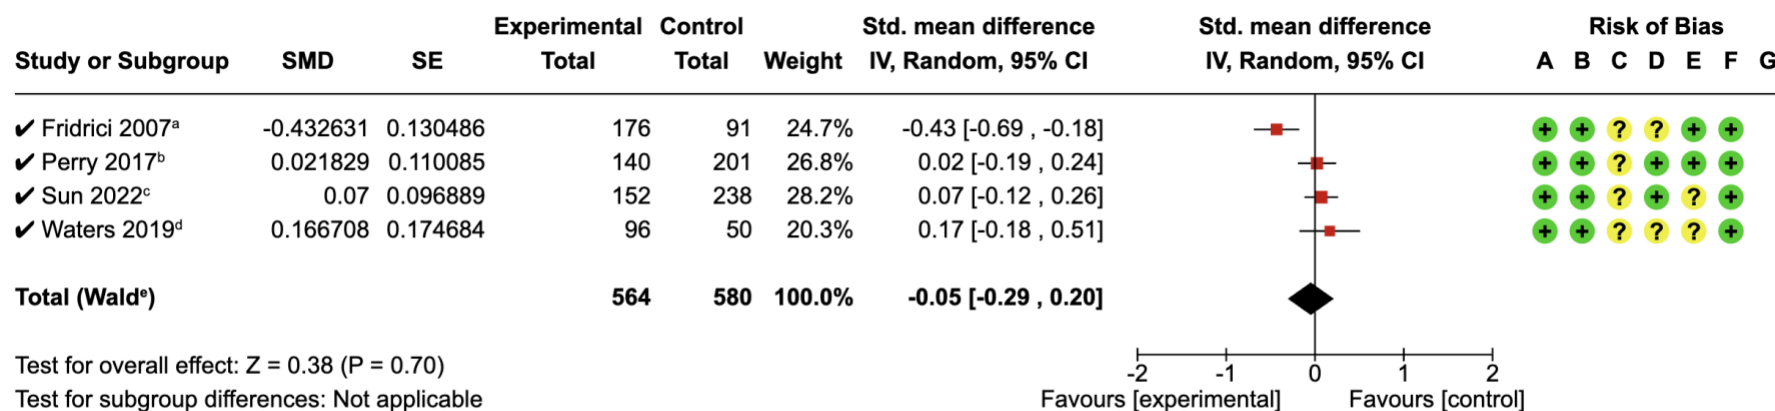

### Footnotes

<sup>a</sup>Hybrid - Between - Randomized; Follow-up at 2-months.

<sup>b</sup>Hybrid - Between - Randomized - 6-month follow-up

<sup>c</sup>Hybrid - Between - Randomized; Follow-up measured at T4, 3-months.

<sup>d</sup>Hybrid - Between - Randomized; Follow-up at 6-months.

<sup>e</sup>CI calculated by Wald-type method.

<sup>f</sup>Tau<sup>2</sup> calculated by DerSimonian and Laird method.

### Risk of bias legend

(A) Random sequence generation (selection bias)

(B) Allocation concealment (selection bias)

(C) Blinding of participants and personnel (performance bias)

(D) Blinding of outcome assessment (detection bias)

(E) Incomplete outcome data (attrition bias)

(F) Selective reporting (reporting bias)

(G) Other bias

## Cognitive – Virtual – Follow-Up ≥ 1-month to ≤ 6-months

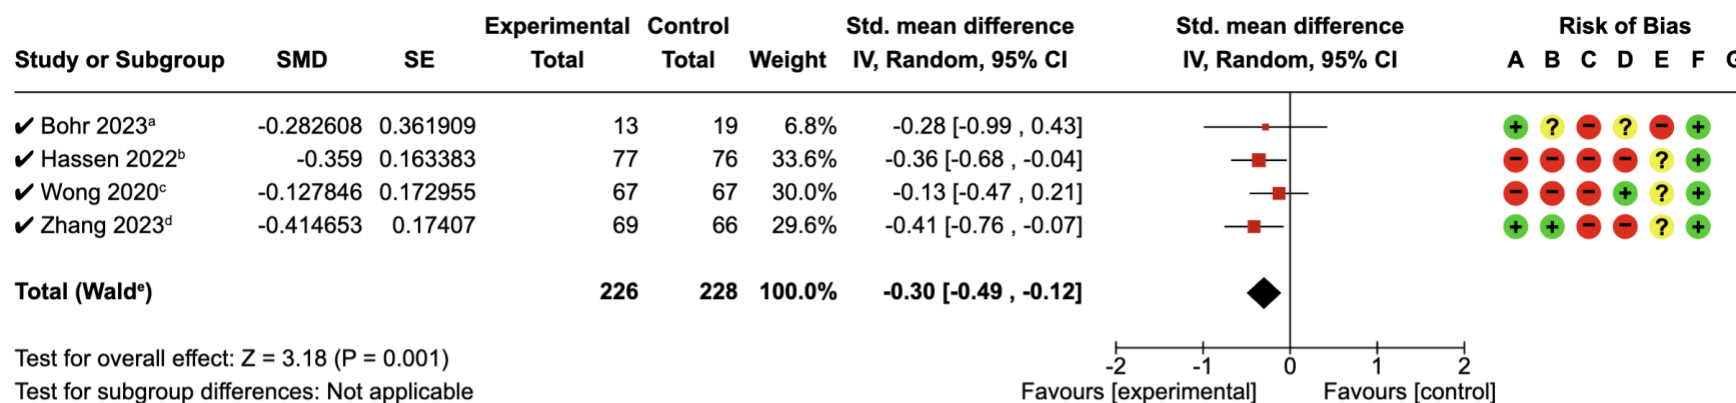

### Footnotes

<sup>a</sup>Virtual - Between-Randomized; Posttest measured at 7 weeks.

<sup>b</sup>Virtual - Between-Non-Randomized; Posttest measured at 7 weeks.

<sup>c</sup>Virtual - Within - Non-Randomized; Posttest measured at 1-month.

<sup>d</sup>Virtual - Between - Randomized; Follow-up at 6-months.

<sup>e</sup>CI calculated by Wald-type method.

<sup>f</sup>Tau<sup>2</sup> calculated by DerSimonian and Laird method.

### Risk of bias legend

(A) Random sequence generation (selection bias)

(B) Allocation concealment (selection bias)

(C) Blinding of participants and personnel (performance bias)

(D) Blinding of outcome assessment (detection bias)

(E) Incomplete outcome data (attrition bias)

(F) Selective reporting (reporting bias)

(G) Other bias
